# Supplementary material
Source: PubMed Central journal article supplement (PMC5892572)
Supplement: supp_RA117.000618_133423_2_supp_72746_p3vbc1.pdf [file supp_RA117.000618_133423_2_supp_72746_p3vbc1.pdf]

# Supporting Information

## Figure S1

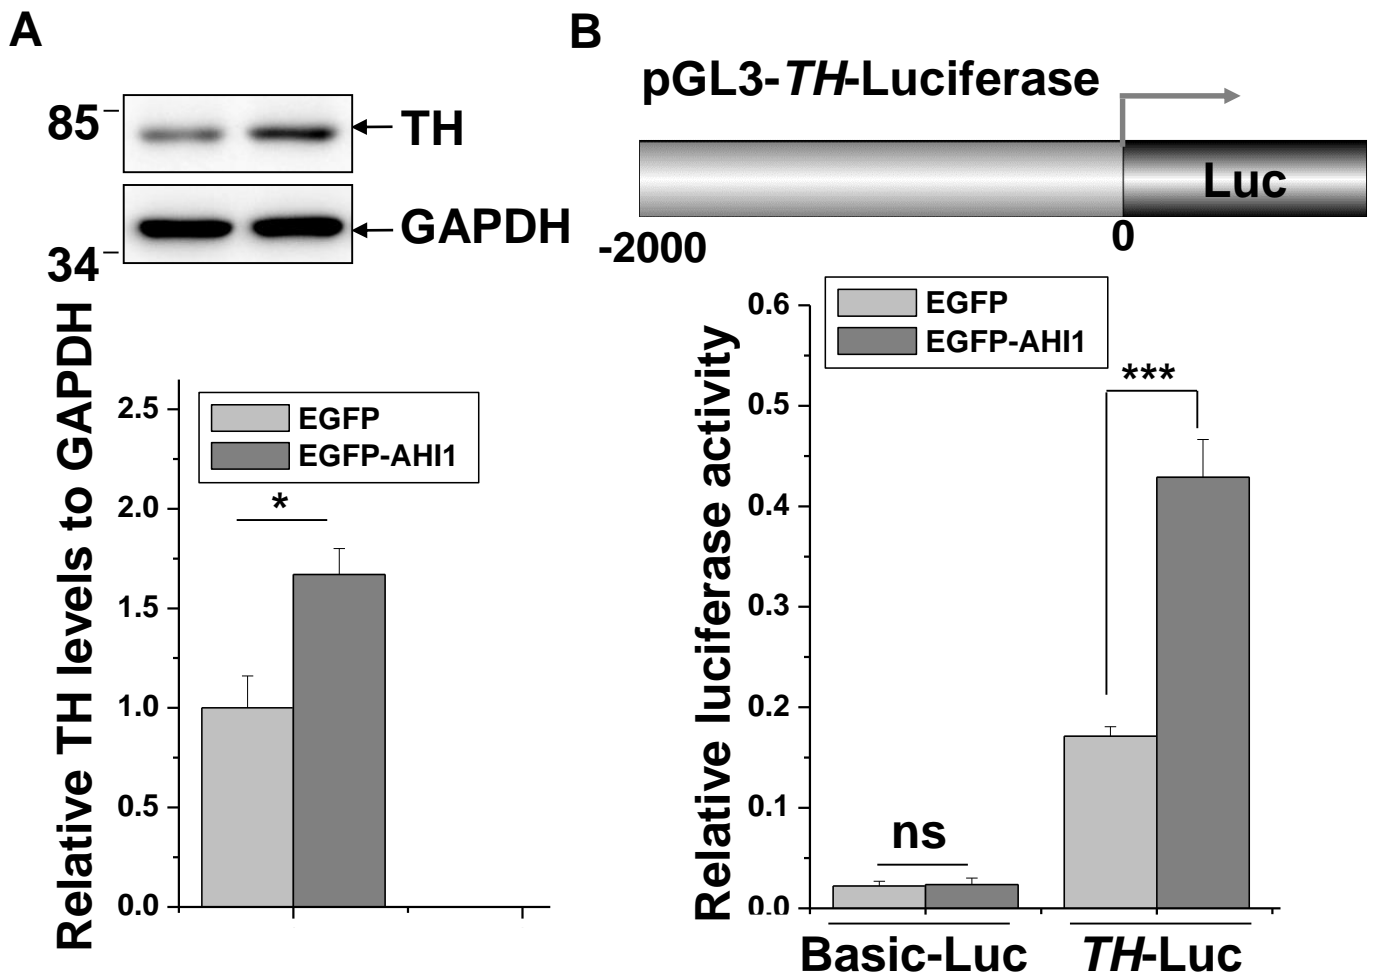

**Figure S1.** **A**, N2a cells were transfected with EGFP or EGFP-AHI1. Forty-eight hr after transfection, the cell lysates were subjected to immunoblot analysis. The relative intensities of TH to GAPDH shown in lower panel were analyzed. \*,  $P < 0.05$ ,  $n=3$ . **B**, HEK293 cells were transfected with PGL3-Basic-Luc or PGL3-TH-Luc along with EGFP or EGFP-AHI1. Forty-eight hr after transfection, Luciferase reporter assays were performed. \*\*\*,  $P < 0.001$ , ns, no statistical significance,  $n=3$ .

**Figure S2**

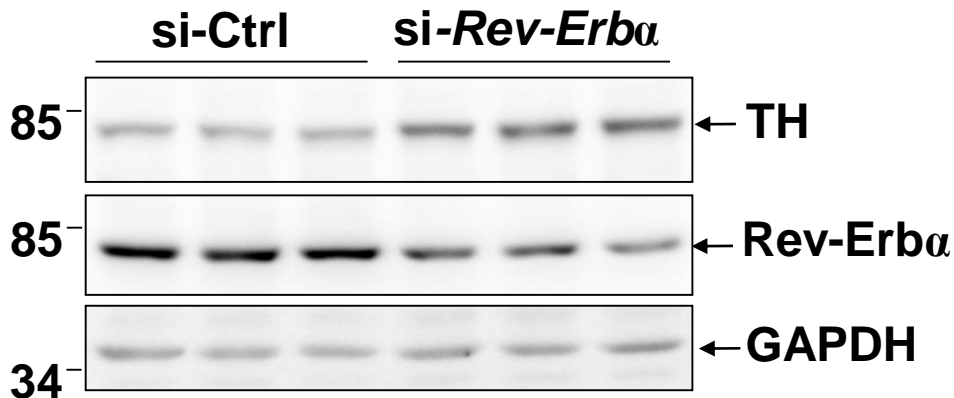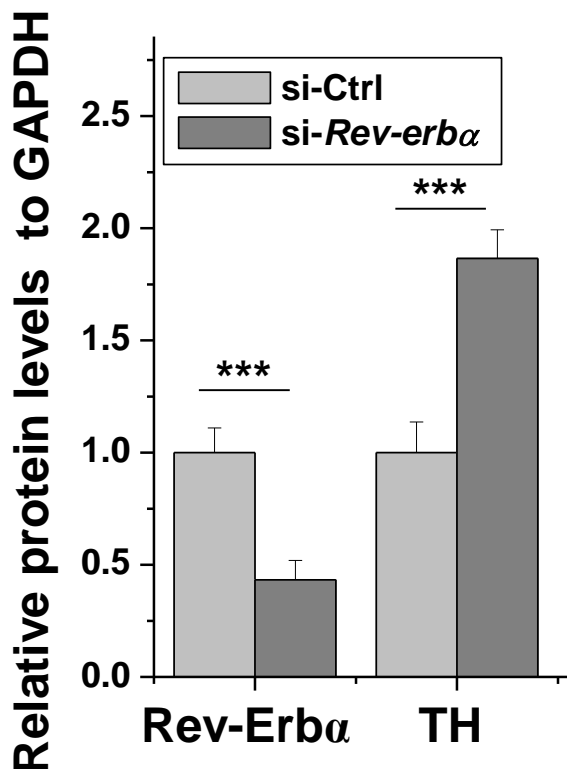

**Figure S2.** N2a cells were transfected with indicated siRNAs. Seventy-two hr after transfection, the total cell lysates were subjected to immunoblot analysis. The relative levels of Rev-Erb $\alpha$  or TH to GAPDH in (lower panel) were analyzed. \*\*\*,  $P < 0.001$ ,  $n=3$ .

**Figure S3**

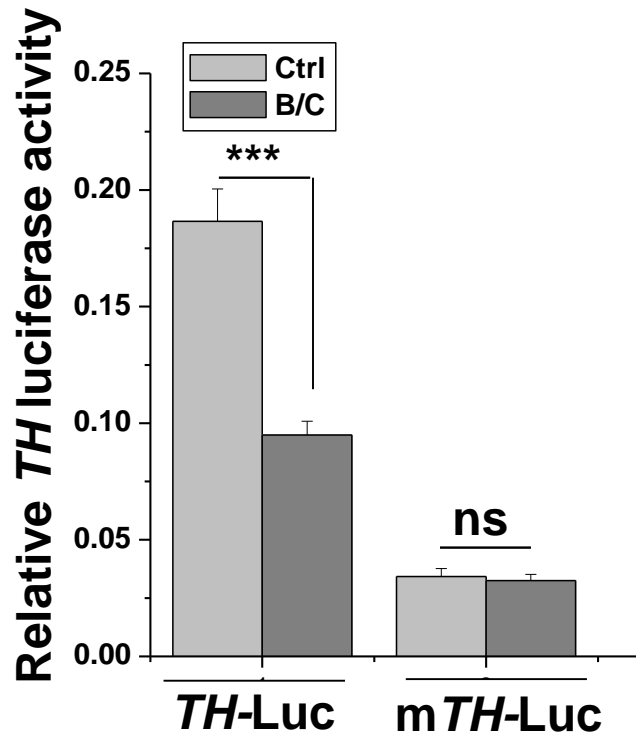

**Figure S3.** HEK293 cells were transfected with PGL3-*TH*-Luc or PGL3-*mTH*-Luc along with HA or HA-BMAL1/HA-CLOCK (B/C), respectively. Forty-eight hr after transfection, Luciferase reporter assay was performed. \*\*\*,  $P < 0.001$ , ns, no statistical significance,  $n=3$ .

Figure S4

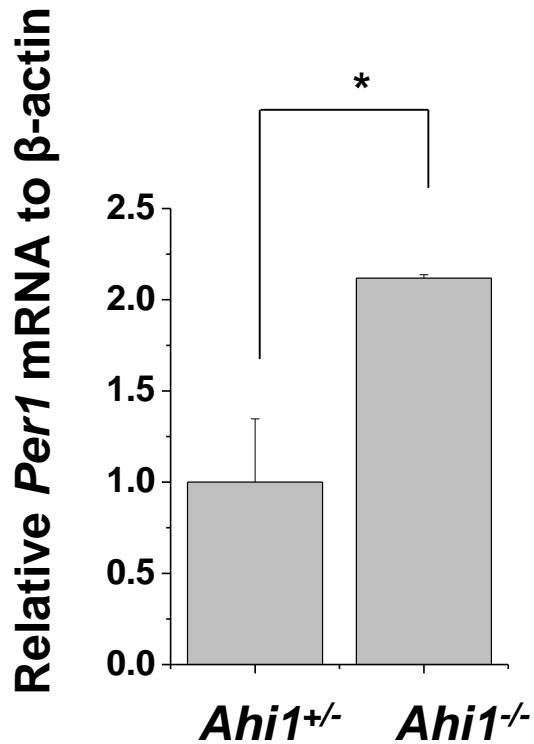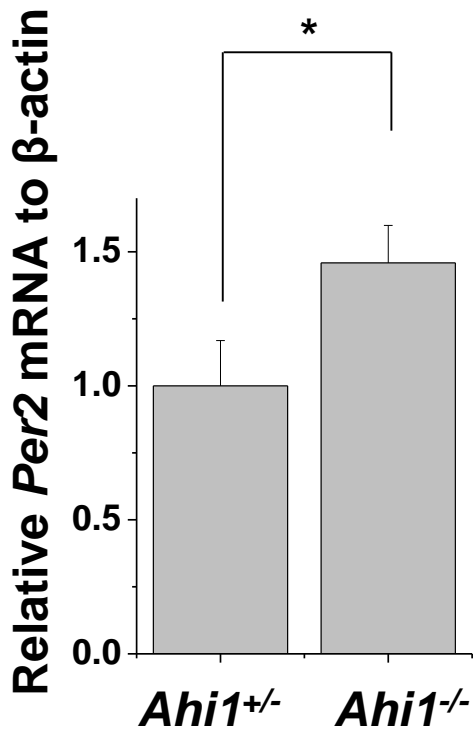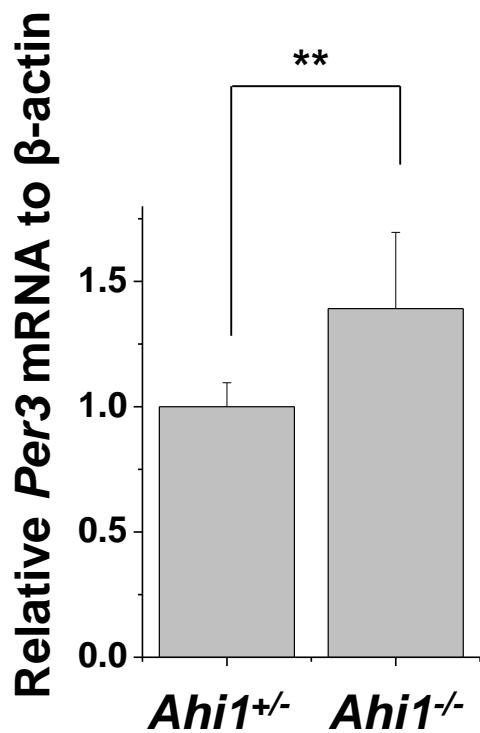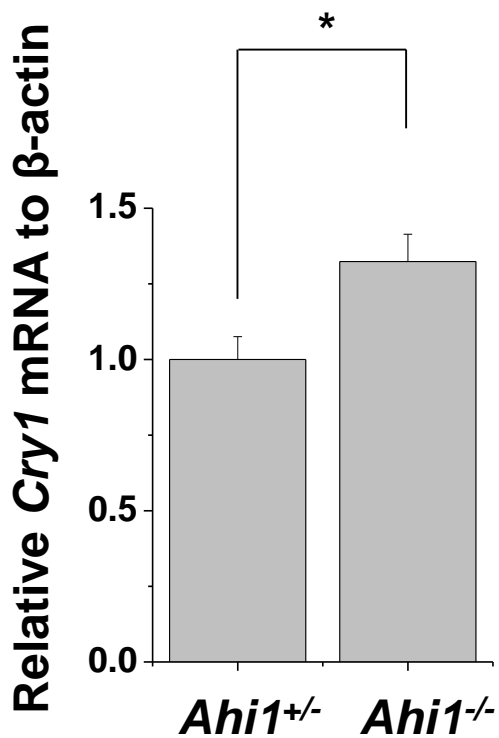

## Figure S4 continued

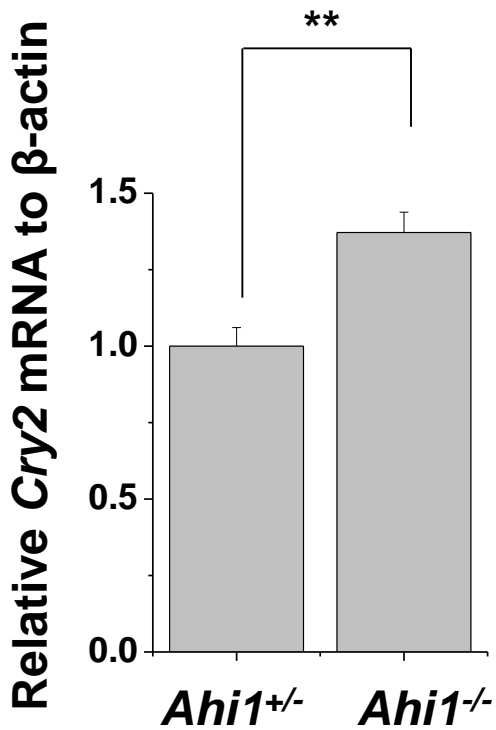

**Figure S4.** Relative mRNA levels of *Per1*, *Per2*, *Per3*, *Cry1* or *Cry2* of *Ahi1* KO mouse midbrains and littermate controls were examined using qRT-PCR, \*,  $P < 0.05$ , \*\*,  $P < 0.01$ ,  $n=5$ .
